# Supplementary material
Source: PubMed Central journal article supplement (PMC4224521)
Supplement: mp500306k_si_001.pdf [file mp500306k_si_001.pdf]

## Supporting Information

# *In Vivo* Tumor Vasculature Targeted PET/NIRF Imaging with TRC105(Fab)-conjugated, Dual- labeled Mesoporous Silica Nanoparticles

*Feng Chen,<sup>1,6</sup> Tapas R. Nayak,<sup>1,6</sup> Shreya Goel,<sup>2</sup> Hector F. Valdovinos,<sup>3</sup> Hao Hong,<sup>1</sup> Charles P. Theuer,<sup>4</sup> Todd E. Barnhart,<sup>3</sup> Weibo Cai<sup>\*1,2,3,5</sup>*

<sup>1</sup> Department of Radiology, University of Wisconsin - Madison, WI, USA

<sup>2</sup> Materials Science Program, University of Wisconsin - Madison, WI, USA

<sup>3</sup> Department of Medical Physics, University of Wisconsin - Madison, WI, USA

<sup>4</sup> TRACON Pharmaceuticals, Inc., San Diego, CA, USA

<sup>5</sup> University of Wisconsin Carbone Cancer Center, Madison, WI, USA

<sup>6</sup> Feng Chen and Tapas R. Nayak contributed equally to this work

## Supplementary Figures and Tables

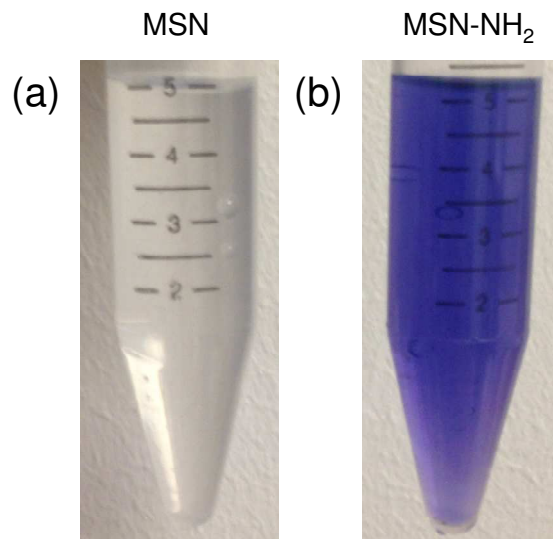

**Figure S1.** Ninhydrin testing of (a) pure MSN and (b) MSN-NH<sub>2</sub>.

**Table S1.** PET ROI quantifications of <sup>64</sup>Cu-MSN-800CW-TRC105 (targeted group).

| Targeted group | 0.5 h      | 4 h        | 14 h       | 24 h       | 48 h      |
|----------------|------------|------------|------------|------------|-----------|
| (n = 3)        | (%ID/g)    | (%ID/g)    | (%ID/g)    | (%ID/g)    | (%ID/g)   |
| Liver          | 23.2 ± 3.5 | 19.5 ± 2.2 | 12.7 ± 1.0 | 11.7 ± 0.8 | 9.2 ± 0.6 |
| Tumor          | 5.5 ± 0.4  | 5.4 ± 0.2  | 3.9 ± 0.1  | 3.9 ± 0.1  | 3.3 ± 0.3 |
| Blood          | 4.6 ± 0.6  | 3.2 ± 0.2  | 3.0 ± 0.1  | 2.2 ± 0.4  | 2.0 ± 0.2 |
| Muscle         | 1.0 ± 0.0  | 0.7 ± 0.1  | 0.7 ± 0.0  | 0.8 ± 0.1  | 0.8 ± 0.0 |

**Table S2.** PET ROI quantifications of <sup>64</sup>Cu-MSN-800CW-TRC105 (non-targeted group).

| <b>Non-targeted group</b><br><b>(n = 3)</b> | 0.5 h<br>(%ID/g) | 4 h<br>(%ID/g) | 14 h<br>(%ID/g) | 24 h<br>(%ID/g) | 48 h<br>(%ID/g) |
|---------------------------------------------|------------------|----------------|-----------------|-----------------|-----------------|
| Liver                                       | 20.9 ± 1.2       | 19.4 ± 0.7     | 16.2 ± 0.6      | 13.8 ± 0.2      | 10.5 ± 1.0      |
| Tumor                                       | 2.1 ± 0.2        | 2.4 ± 0.3      | 2.1 ± 0.3       | 2.0 ± 0.3       | 1.7 ± 0.1       |
| Blood                                       | 3.3 ± 0.5        | 3.1 ± 0.5      | 2.9 ± 0.8       | 2.6 ± 0.6       | 2.4 ± 0.5       |
| Muscle                                      | 0.8 ± 0.1        | 0.7 ± 0.0      | 0.7 ± 0.0       | 0.7 ± 0.0       | 0.6 ± 0.0       |

**Table S3.** PET ROI quantifications of <sup>64</sup>Cu-MSN-800CW-TRC105 (blocking group).

| <b>Blocking group</b><br><b>(n = 3)</b> | 0.5 h<br>(%ID/g) | 4 h<br>(%ID/g) | 14 h<br>(%ID/g) | 24 h<br>(%ID/g) | 48 h<br>(%ID/g) |
|-----------------------------------------|------------------|----------------|-----------------|-----------------|-----------------|
| Liver                                   | 22.8 ± 4.8       | 17.2 ± 2.4     | 13.2 ± 1.1      | 12.4 ± 1.4      | 10.2 ± 0.8      |
| Tumor                                   | 2.9 ± 0.5        | 2.3 ± 0.2      | 2.1 ± 0.1       | 2.0 ± 0.1       | 1.7 ± 0.2       |
| Blood                                   | 3.7 ± 0.6        | 3.1 ± 0.6      | 2.9 ± 0.6       | 2.7 ± 0.6       | 2.2 ± 0.4       |
| Muscle                                  | 1.1 ± 0.3        | 0.8 ± 0.1      | 0.8 ± 0.1       | 0.8 ± 0.1       | 0.9 ± 0.1       |

**Table S4.** Summary of tumor-to-organ ratios in targeted group.

| <b>Targeted group</b><br><b>(n = 3)</b> | 0.5 h     | 4 h       | 14 h      | 24 h      | 48 h      |
|-----------------------------------------|-----------|-----------|-----------|-----------|-----------|
| T/M                                     | 5.2 ± 0.2 | 7.3 ± 1.1 | 5.3 ± 0.3 | 4.9 ± 0.6 | 4.1 ± 0.3 |
| T/B                                     | 1.2 ± 0.2 | 1.7 ± 0.1 | 1.3 ± 0.0 | 1.8 ± 0.3 | 1.6 ± 0.2 |
| T/L                                     | 0.2 ± 0.0 | 0.3 ± 0.0 | 0.3 ± 0.0 | 0.3 ± 0.0 | 0.4 ± 0.0 |

**Table S5.** Summary of tumor-to-organ ratios in non-targeted group.

| <b>Non-targeted group<br/>(n = 3)</b> | 0.5 h     | 4 h       | 14 h      | 24 h      | 48 h      |
|---------------------------------------|-----------|-----------|-----------|-----------|-----------|
| T/M                                   | 2.6 ± 0.1 | 3.1 ± 0.5 | 3.1 ± 0.4 | 3.0 ± 0.6 | 2.7 ± 0.2 |
| T/B                                   | 0.6 ± 0.1 | 0.8 ± 0.0 | 0.7 ± 0.1 | 0.8 ± 0.1 | 0.7 ± 0.1 |
| T/L                                   | 0.1 ± 0.0 | 0.1 ± 0.0 | 0.1 ± 0.0 | 0.1 ± 0.0 | 0.2 ± 0.0 |

**Table S6.** Summary of tumor-to-organ ratios in blocking group.

| <b>Blocking group<br/>(n = 3)</b> | 0.5 h     | 4 h       | 14 h      | 24 h      | 48 h      |
|-----------------------------------|-----------|-----------|-----------|-----------|-----------|
| T/M                               | 2.8 ± 0.3 | 2.8 ± 0.2 | 2.8 ± 0.4 | 2.4 ± 0.3 | 2.0 ± 0.4 |
| T/B                               | 0.8 ± 0.0 | 0.8 ± 0.1 | 0.7 ± 0.1 | 0.8 ± 0.2 | 0.8 ± 0.1 |
| T/L                               | 0.1 ± 0.0 | 0.1 ± 0.0 | 0.1 ± 0.0 | 0.1 ± 0.0 | 0.2 ± 0.0 |

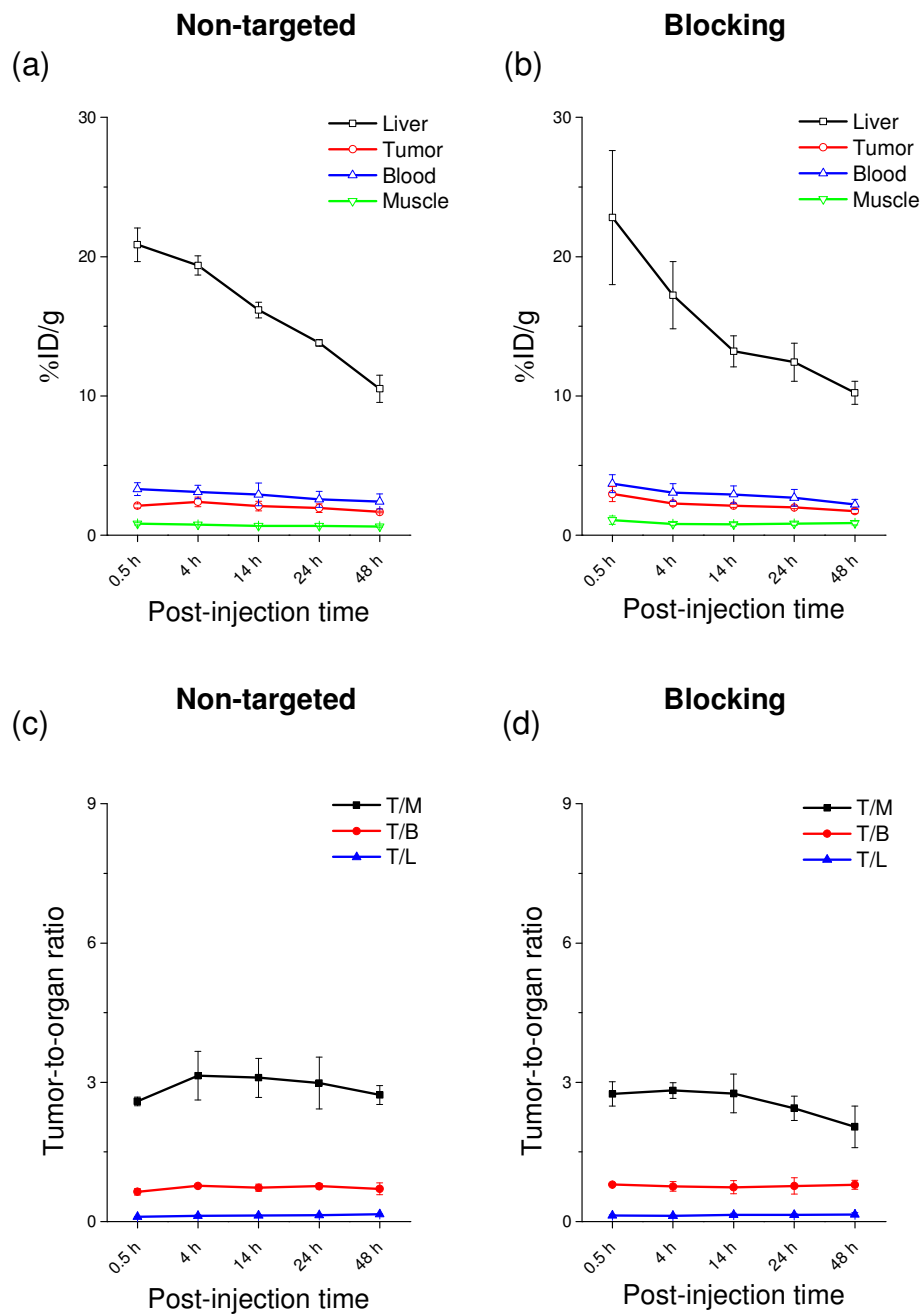

**Figure S2.** Quantitative analysis of the PET data. Time-activity curves of the liver, 4T1 tumor, blood, and muscle upon intravenous injection of (a) non-targeted group:  $^{64}\text{Cu}$ -MSN-800CW, and (b) blocking group:  $^{64}\text{Cu}$ -MSN-800CW-TRC105(Fab) after a blocking dose of TRC105 (1 mg/mouse). Time-activity curves of tumor-to-muscle (T/M), tumor-to-blood (T/B) and tumor-to-liver (T/L) ratios of (c) non-targeted group and (d) blocking group.
